# Supplementary material for: Absolute Quantification of Viable but Nonculturable Vibrio cholerae Using Droplet Digital PCR with Oil-Enveloped Bacterial Cells
Source: PubMed Central journal article supplement (PMC9430983; doi:10.1128/spectrum.00704-22), 2022-06-28

Supplemental file: Figure S1. Correspondence of cell counting among CFU counting, PMA-qPCR and PMA-ddPCR methods. *thyA* gene copy counting with PMA-qPCR and PMA-ddPCR was listed as the example.

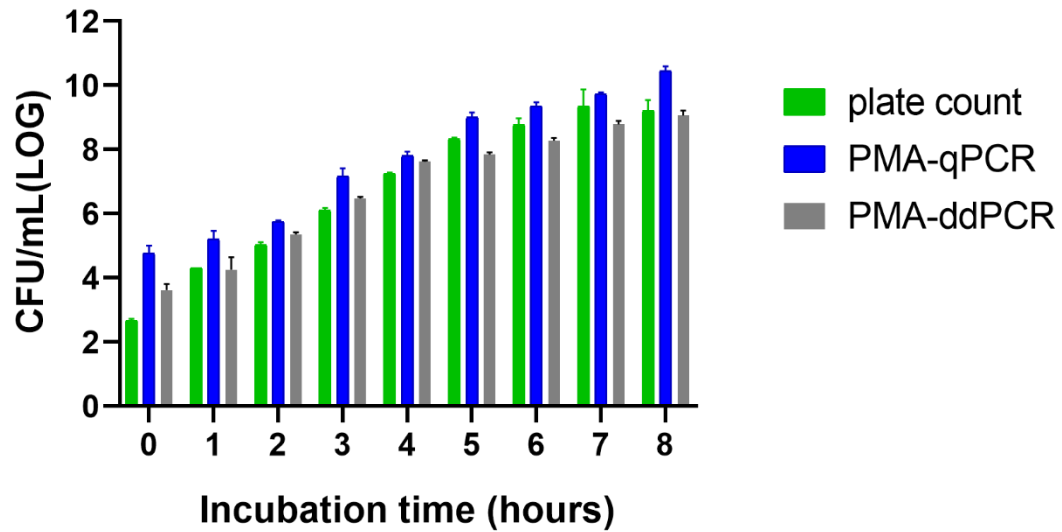

Supplement: spectrum.00704-22-s0001.pdf [file spectrum.00704-22-s0001.pdf]
